# Supplementary material for: Impact of Extracellular Vesicle Isolation Methods on Downstream miRNA Analysis in Semen: A Comparative Study
Source: PubMed Central journal article supplement (PMC7504614; doi:10.3390/ijms21175949), 2020-08-19
Supplement: ijms-21-05949-s001.pdf [file ijms-21-05949-s001.pdf]

## Supplementary data

**Supplementary Table S1.** Nanoparticle tracking analysis (NTA) measurement of particle size of EV-extracts obtained with the different methods used

A)

| Extraction method                    | Cumulative percentage of particle distribution (%) |          |          |
|--------------------------------------|----------------------------------------------------|----------|----------|
|                                      | 105 (nm)                                           | 155 (nm) | 255 (nm) |
| Ultracentrifugation (n=5)            | 21,2                                               | 72,5     | 91,3     |
| Exo-GAG 1500xg (n=2)                 | 28,3                                               | 82,2     | 95,7     |
| Exo-GAG 3500xg (n=4)                 | 25,3                                               | 83,7     | 94,0     |
| ExoQuick ULTRA A 3000xg (n=2)        | 6,3                                                | 31,4     | 56,0     |
| ExoQuick ULTRA A 1500xg (n=1)        | 12,7                                               | 48,1     | 73,5     |
| ExoQuick ULTRA B 3000xg (n=2)        | 12,3                                               | 65,9     | 85,6     |
| ExoQuick ULTRA B 1500xg (n=1)        | 10,7                                               | 62,0     | 90,6     |
| miRCURY Cell/Urine/CSF 10000xg (n=2) | 8,8                                                | 61,8     | 77,8     |
| miRCURY Cell/Urine/CSF 1500xg (n=2)  | 19,6                                               | 70,9     | 88,1     |
| miRCURY Serum (n=2)                  | 14,2                                               | 69,9     | 85,9     |

B)

| Extraction method                     | Size mean (nm) | Size mode (nm) | Size D10 (nm) | Size D50 (nm) | Size D90 (nm) |
|---------------------------------------|----------------|----------------|---------------|---------------|---------------|
| Ultracentrifugation (n=5)             | 147,26±4,44    | 119,10±1,96    | 53,12±3,39    | 91,62±1,66    | 123,22±3,96   |
| ExoGAG 1500x g (n=2)                  | 134,05±4,75    | 115,20±0,30    | 86,50±1,60    | 114,15±3,10   | 176,00±4,95   |
| ExoGAG 3500x g (n=4)                  | 135,23±2,52    | 117,45±1,83    | 45,95±4,06    | 87,53±0,95    | 113,93±1,31   |
| ExoQuick ULTRA A 3000x g (n=2)        | 223,10±5,40    | 144,10±7,40    | 106,25±6,90   | 185,45±3,95   | 351,00±3,65   |
| ExoQuick ULTRA B 3000x g (n=2)        | 158,85±7,05    | 138,65±14,75   | 97,60±7,00    | 134,90±0,90   | 218,60±6,40   |
| ExoQuick ULTRA A 1500x g (n=1)        | 182,6          | 128            | 101,3         | 139,9         | 327,9         |
| ExoQuick ULTRA B 1500x g (n=1)        | 153,6          | 119,1          | 100,6         | 130,1         | 200,9         |
| miRCURY cell/Urine/CSF 10000x g (n=2) | 184,65±6,95    | 122,85±0,25    | 101,05±4,95   | 133,70±1,45   | 337,00±3,60   |
| miRCURY cell/Urine/CSF 1500x g (n=2)  | 152,40±3,20    | 114,30±1,60    | 63,55±0,85    | 92,45±0,15    | 124,70±3,20   |
| miRCURY Serum (n=2)                   | 157,55±1,05    | 123,25±5,35    | 66,75±2,75    | 95,70±1,90    | 128,10±0,40   |

**Supplementary Table S2.** List of the selected miRNAs and their sequences.

| <b>miRNA</b> | <b>5'- 3' Sequence</b>   | <b>No. nucleotides</b> | <b>miRNA PCa-associated Publication reference</b>                              |
|--------------|--------------------------|------------------------|--------------------------------------------------------------------------------|
| let-7i-3p*   | CUGCGCAAGCUACUGCCUUGCU   | 22                     |                                                                                |
| miR-106b-5p  | UAAAGUGCUGACAGUGCAGAU    | 21                     |                                                                                |
| miR-125a-5p  | UCCCUGAGACCCUUUAACCUGUGA | 24                     | Fu et al.,2015. Oncotarget                                                     |
| miR-130a-3p  | CAGUGCAAUGUUAAAAGGGCAU   | 22                     | Zhang et al., 2019. Eur Rev. Med Pharmacol Sci                                 |
| miR-142-3p*  | UGUAGUGUUUCCUACUUUAUGGA  | 23                     | Barceló et al., 2019 Sci Rep; Tan et al., 2020 J Cancer                        |
| miR-142-5p*  | CAUAAAGUAGAAAGCACUACU    | 21                     | Barceló et al., 2019 Sci Rep                                                   |
| miR-181c-5p  | AACAUUCAACCUGUCGGUGAGU   | 22                     |                                                                                |
| miR-196b-3p  | UCGACAGCACGACACUGCCUUC   | 22                     | Jeong et al., 2017. Mol Cell                                                   |
| miR-223-3p   | UGUCAGUUUGUCAAAUACCCCA   | 22                     | Barceló et al., 2019 Sci Rep; Feng et al., 2018 Gene; Wei et al., 2014 Sci Rep |
| miR-30c-5p   | UGUAAACAUCCUACACUCUCAGC  | 23                     | Kumar et al., 2016 Oncotarget                                                  |
| miR-30e-3p   | CUUUCAGUCGGAUGUUUACAGC   | 22                     |                                                                                |
| miR-34a-3p   | CAAUCAGCAAGUAUACUGCCCU   | 22                     |                                                                                |
| miR-34a-5p   | UGGCAGUGUCUUAGCUGGUUGU   | 22                     | Ma et a., 2019 Onco Targets Ther.                                              |
| miR-576-5p   | AUUCUAAUUUCUCCACGUCUUU   | 22                     |                                                                                |
| miR-663b*    | GGUGGCCCGGCCGUGCCUGAGG   | 22                     |                                                                                |
| miR-92a-3p   | UAUUGCACUUGUCCCGCCUGU    | 22                     | Huo et al., 2020 Cancer Cell Int                                               |
